# Supplementary material
Source: Springer Nature journal article supplement (https://www.springermedizin.de/resource/supplementary/13045_2009_77_MOESM3_ESM.pdf/9660612)

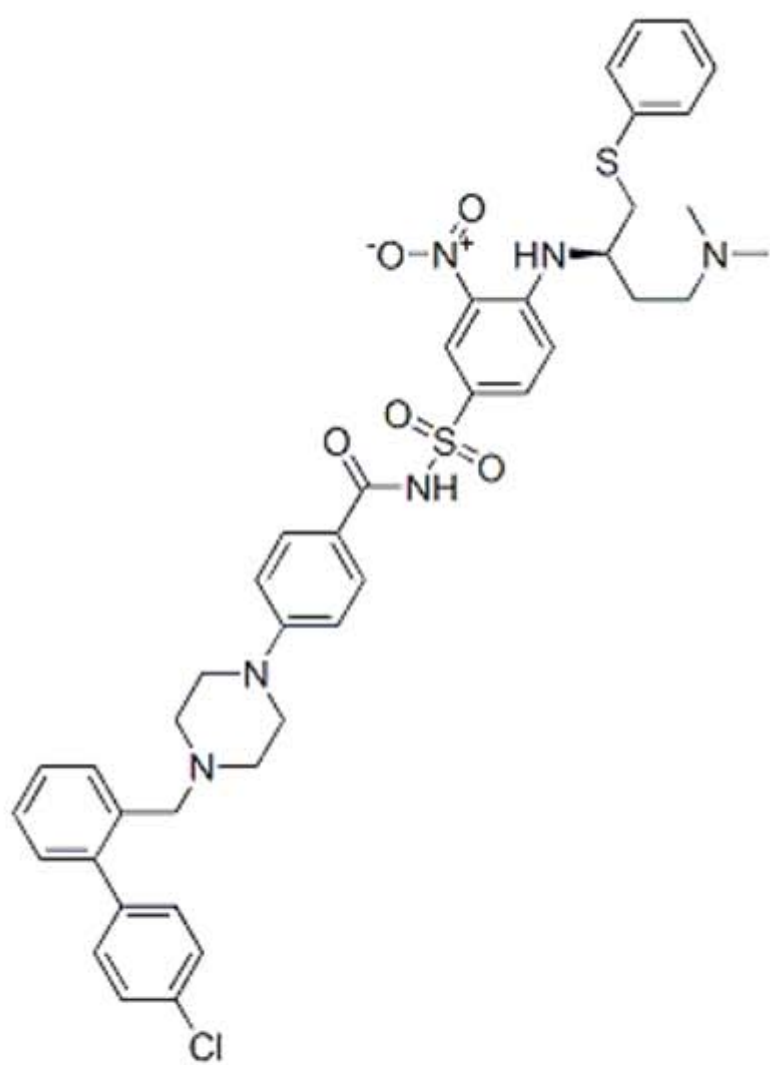

ABT 737

Supplement: MOESM3 [file 9660612]
